# Supplementary material
Source: PubMed Central journal article supplement (PMC4657585)

SUPPLEMENTARY DATA

**Supplementary Table 1. (from fig. 5) BMP-7 acts partially through the SMAD pathway.** C-peptide (ng/μg of DNA) following hNEPT treatment with BMP-4, THR-123, and BMP-7/BMP-7 + dorsomorphin.

| Prep | <i>C-peptide (ng/μg of DNA)</i> |         |       |         |       |            |
|------|---------------------------------|---------|-------|---------|-------|------------|
|      | T=0                             | Control | BMP-4 | THR-123 | BMP-7 | BMP-7 + DM |
| 1    | 0.5                             | 5.1     | 76.1  |         | 51.8  | 34.2       |
| 2    | 0.6                             | 17.6    | 47.2  |         |       |            |
| 3    | 0.1                             | 11.8    | 56.6  |         | 40.3  | 22.8       |
| 4    | 0.1                             | 29.1    |       | 54.6    |       |            |
| 5    | 0.1                             | 9.0     |       | 33.5    |       |            |
| 6    | 1.2                             | 7.6     |       | 18.4    |       |            |
| 7    | 0.1                             | 18      |       |         | 75.0  | 19.5       |

## SUPPLEMENTARY DATA

### Supplementary Table 2. Antibodies used.

Secondary antibodies: Alexa Fluor 488 (706-545-148), 594 (706-515-148) and 647 (706-605-148) Conjugated AffinityPure Donkey Anti-Guinea Pig and Fluorescein (FITC) –conjugated Donkey antichickens (703-096-156), all from Jackson ImmunoResearch laboratories, Inc. Donkey anti-goat 568, donkey anti rabbit 488, donkey anti-mouse 594, donkey anti-mouse 647, goat anti-chicken 488, goat anti-rabbit 488, goat anti-mouse 488 and goat anti-rabbit 568, all from Life technologies: Nucleus was counter-stained with 4', 6-diamidino-2-phenylindole (DAPI, Life technologies D1306).

#### Primary antibodies:

| Name                                   | Host       | Source/ catalog number               | Dilution/<br>Conc. |
|----------------------------------------|------------|--------------------------------------|--------------------|
| Amylase 2B                             | Mouse      | SantaCruz (sc-46657)                 | 1:200              |
| $\alpha$ -Amylase                      | Rabbit     | Sigma (A8273)                        | 1:200              |
| Cytokeratin 19                         | Mouse      | Dako (M0888)                         | 1:100              |
| CA19-9                                 | Mouse      | Leica (NCL-L-CA19-9)                 | 1:100              |
| PDX1                                   | Goat       | R&D systems (AF2419)                 | 15 mg/mL           |
| NKX6.1                                 | Mouse      | DSHB (F55A12-s)                      | 2 mg/mL            |
| MafA                                   | Mouse      | Abcam (ab57807)                      | 1:100              |
| Insulin                                | Guinea pig | Dako (A0564)                         | 1:250              |
| C-peptide                              | Mouse      | Chemicon (CBL94)                     | 1:100              |
| Anti-proinsulin C-peptide clone CPEP-0 | Mouse      | Millipore 05-1109                    | 1:25               |
| Glucagon                               | Rabbit     | Biogenex (PU039-UP)                  | 1:200              |
| Glucagon                               | Rabbit     | Dako (A0565)                         | 1:250              |
| Pancreatic Polypeptide                 | Rabbit     | Chemicon (AB939)                     | 1:200              |
| Somatostatin                           | Rabbit     | Dako (A0566)                         | 1:200              |
| Vimentin                               | Rabbit     | GeneTex (GTX100619)                  | 1:500              |
| GFP                                    | Chicken    | Aves GFP-1020                        | 1:500              |
| BMPR1A (ALK3)                          | Mouse      | Life Span Biosciences<br>1759/58348) | 1:50               |
| Phospho-Smad1/5/9                      | Rabbit     | Cell Signaling 13820                 | 1:250              |

SUPPLEMENTARY DATA

**Supplementary. Figure 1. Real-time imaging (Incucyte Zoom™)-assisted analysis of hNEPT colony growth upon BMP-7 exposure.** X-axis: Time (hours). Y axis: Confluence percentage of a selected field.

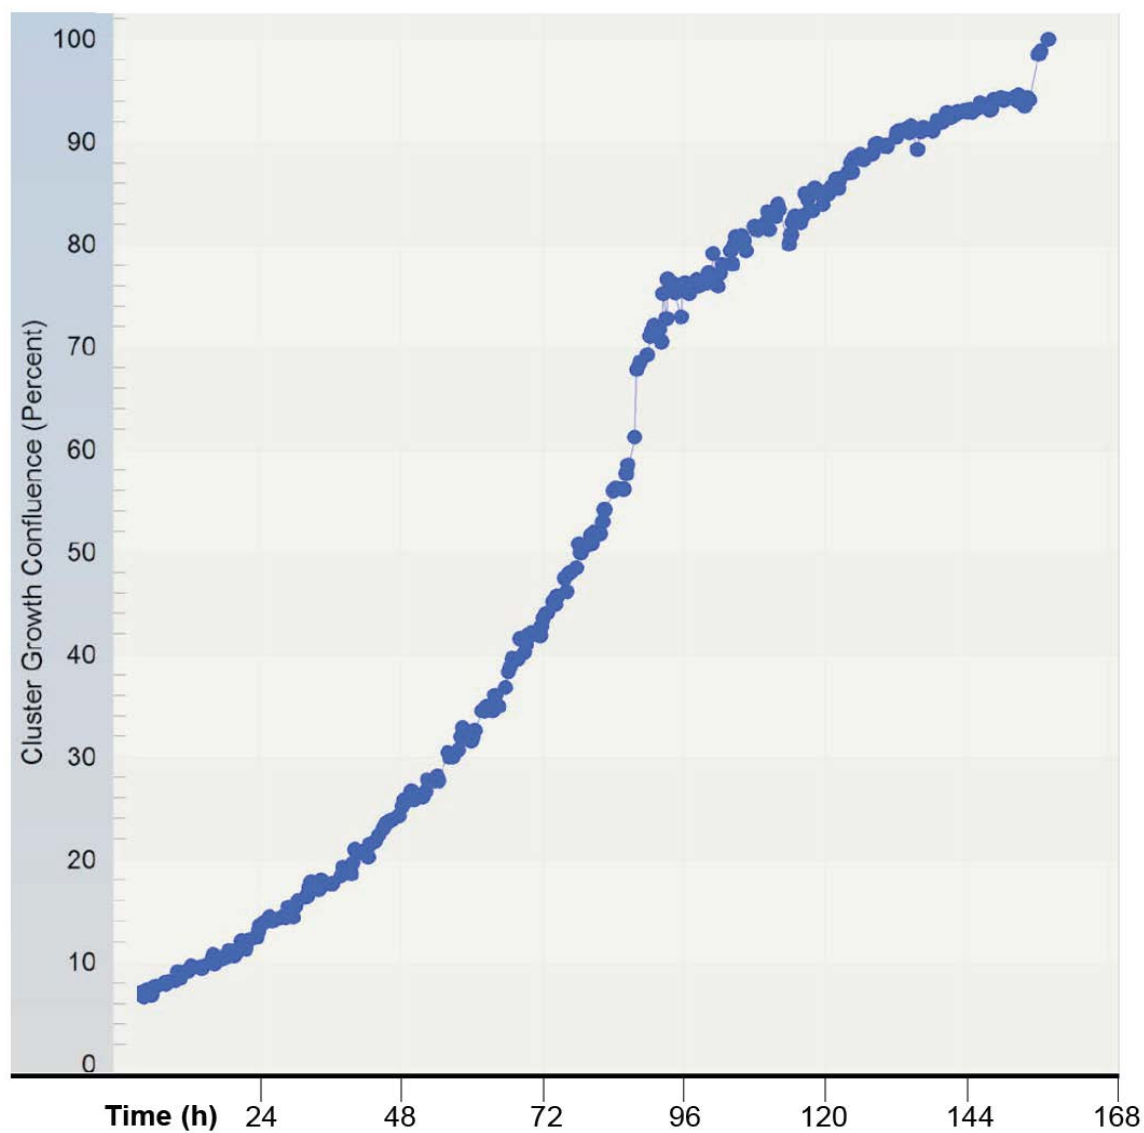

SUPPLEMENTARY DATA

**Supplementary. Figure 2. Long-term hNEPT culture results in phenotypic changes consistent with EMT.** (A) TLDA qRT-PCR stage-wise analysis of gene expression of hNEPT as a function of time in longterm culture. Markers: INS (insulin), PDX1, NKX6.1, Ptf1a, CPA1 (carboxypeptidase A), PNLIP (pancreatic lipase), VIM (vimentin) and CD90. X-axis, stages of culture: 0, after isolation; S1, stage 1 (days 6-8); S2, stage 2 (days 10-12); S3, stage 3 (days 15-17). Of note, the experimental design

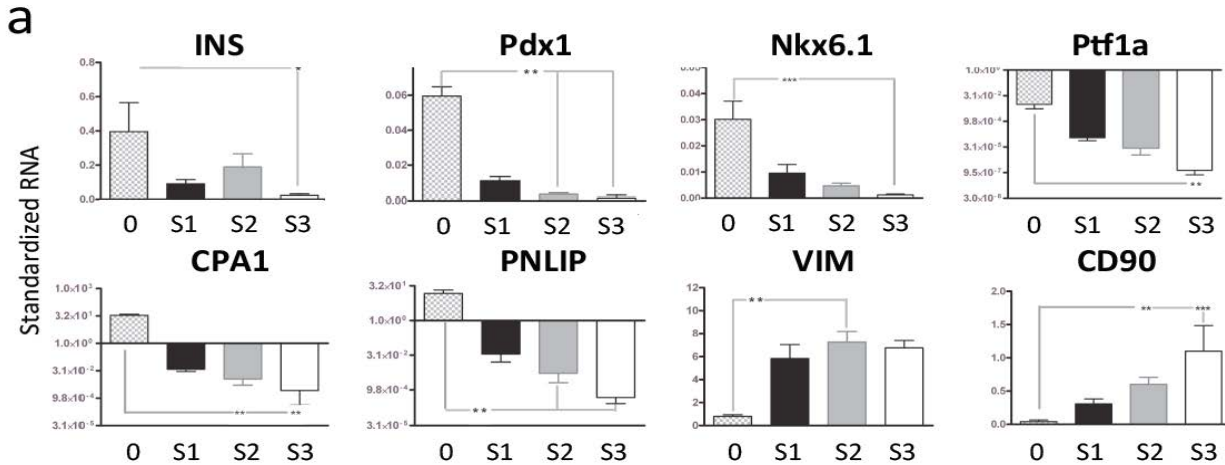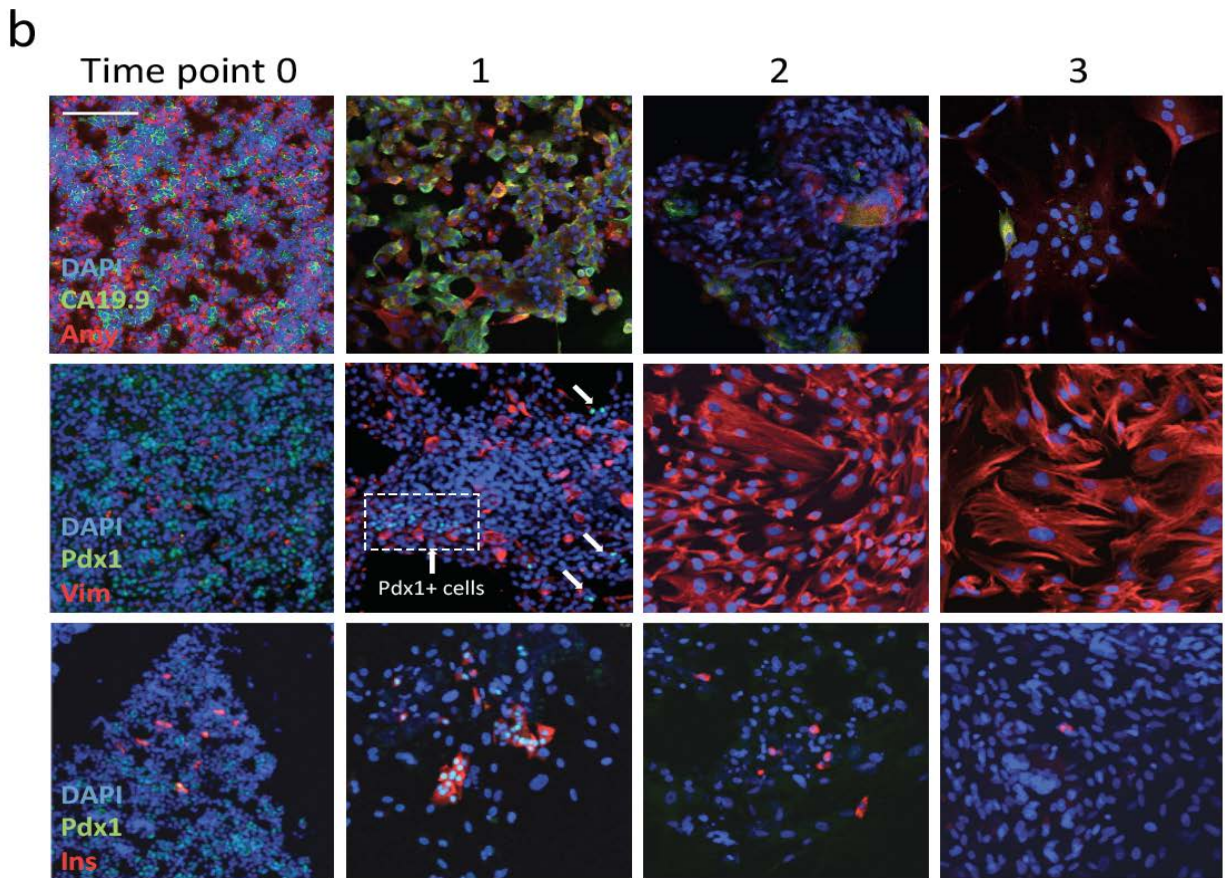

SUPPLEMENTARY DATA

**Supplementary. Figure 3. IF analysis of explanted kidney capsule grafts.** Insulin (green) and amylase (red) expression in engrafted BMP-7-treated hNEPT (POD 130). Size bar: 50  $\mu$ m.

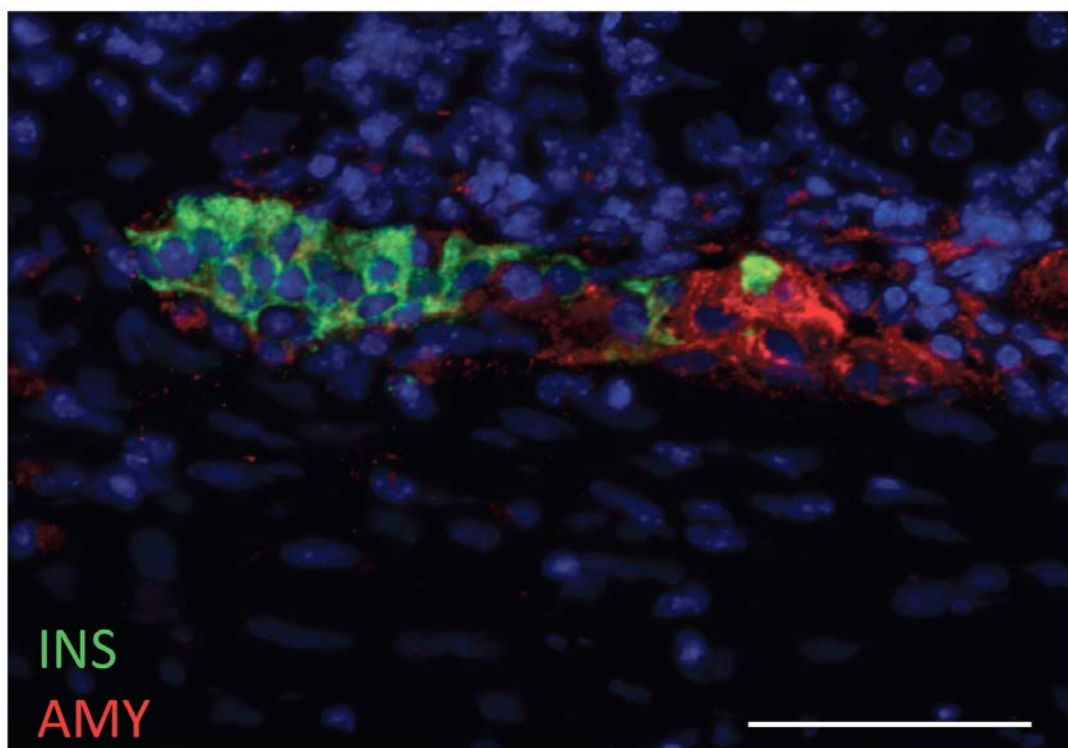

SUPPLEMENTARY DATA

**Supplementary. Figure 4. Stage-wise qRT-PCR analysis of endocrine/exocrine marker expression.** hNEPT were allowed to attach to tissue culture-treated plates for 48h. T=0 represents the analysis conducted on attached cells at 48h. hNEPT were subsequently exposed to BMP-7 in the presence of serum for 4-6d (stage 2). As before, qRT-PCR analyses were done at the end of the stage. In stage 3, cells were cultured for 3-4d in serum-free medium without BMP-7. qRT-PCR was done, again, at the end of the stage. Results are normalized against t=0 (100% of expression). Insulin and other pancreatic/epithelial cell markers were down-regulated in stage 2 (BMP-7 treatment), only to be up-regulated several-fold in the last stage of culture (serum-free, no BMP-7). Of note, fold-increases vs. t=0 are normalized to relevant endogenous controls. However, since there is a ~5-fold increase in DNA content throughout culture (denoting proliferation, see Results), the absolute increase of endocrine/exocrine marker expression at the end of the treatment is actually much higher. Abbreviations: INS, insulin; AMY: amylase; KRT19, cytokeratin 19; GCG: glucagon.

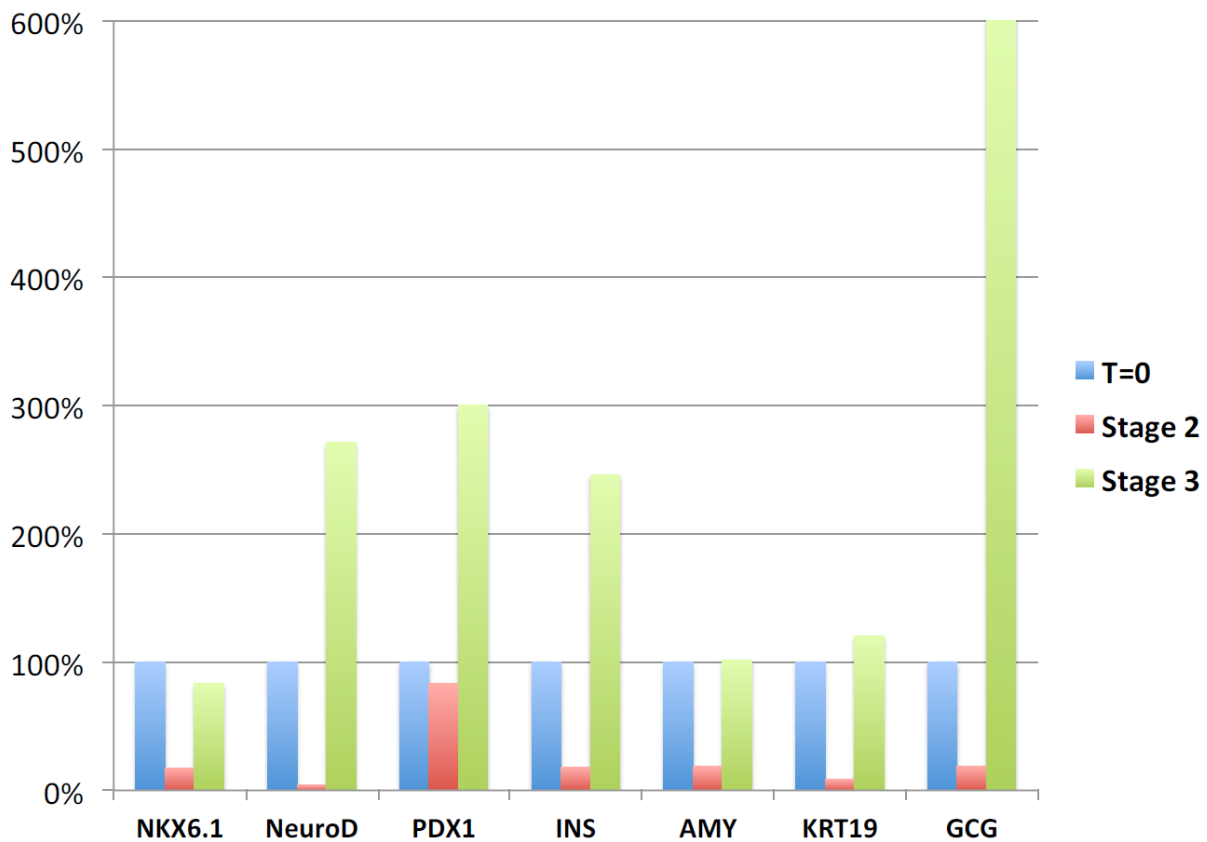

Supplement: supp_db15-0688_DB150688SupplementaryData.pdf [file supp_db15-0688_DB150688SupplementaryData.pdf]
